# Supplementary material for: Facilitating Mitophagy via Pink1/Parkin2 Signaling Is Essential for the Neuroprotective Effect of β-Caryophyllene against CIR-Induced Neuronal Injury
Source: MDPI journal article supplement (doi:10.3390/brainsci12070868), 2022-06-30
Supplement: s1 [file s1]

**Table S1: Summary of 36 recognized mitophagy -associated genes.**

| <b>Gene</b> | <b>Type</b> |
|-------------|-------------|
| ULK1        | Mitophagy   |
| FUNDC1      | Mitophagy   |
| PGAM5       | Mitophagy   |
| TOMM40      | Mitophagy   |
| TOMM5       | Mitophagy   |
| TOMM20      | Mitophagy   |
| TOMM7       | Mitophagy   |
| TOMM22      | Mitophagy   |
| MFN2        | Mitophagy   |
| PINK1       | Mitophagy   |
| SQSTM1      | Mitophagy   |
| VDAC1       | Mitophagy   |
| VDAC2       | Mitophagy   |
| VDAC3       | Mitophagy   |
| ATG12       | Mitophagy   |
| ATG5        | Mitophagy   |
| CISD2       | Mitophagy   |
| CISD1       | Mitophagy   |
| COX4I1      | Mitophagy   |
| CISD3       | Mitophagy   |
| SOD1        | Mitophagy   |
| BECN1       | Mitophagy   |
| ITPR1       | Mitophagy   |
| WFS1        | Mitophagy   |
| SFXN4       | Mitophagy   |
| CIAPIN1     | Mitophagy   |
| MRFAP1      | Mitophagy   |
| HTRA2       | Mitophagy   |
| MFN1        | Mitophagy   |
| PARK2       | Mitophagy   |
| PARK7       | Mitophagy   |
| GPR37       | Mitophagy   |
| HSP90AA1    | Mitophagy   |
| SNCA        | Mitophagy   |
| UBE2L3      | Mitophagy   |
| SNCAIP      | Mitophagy   |
